# Supplementary material for: Influence of Fenugreek Flour (Trigonella foenum-graecumL.) Addition on the Technofunctional Properties of Dark Wheat Flour
Source: Hindawi journal article supplement (doi:10.1155/2019/8635806), 2019-05-19
Supplement: f1 [file 8635806.f1.docx]

Table 1 (Supplementary Material) Pearson correlations between phisico-chemical, textural and sensory parameters


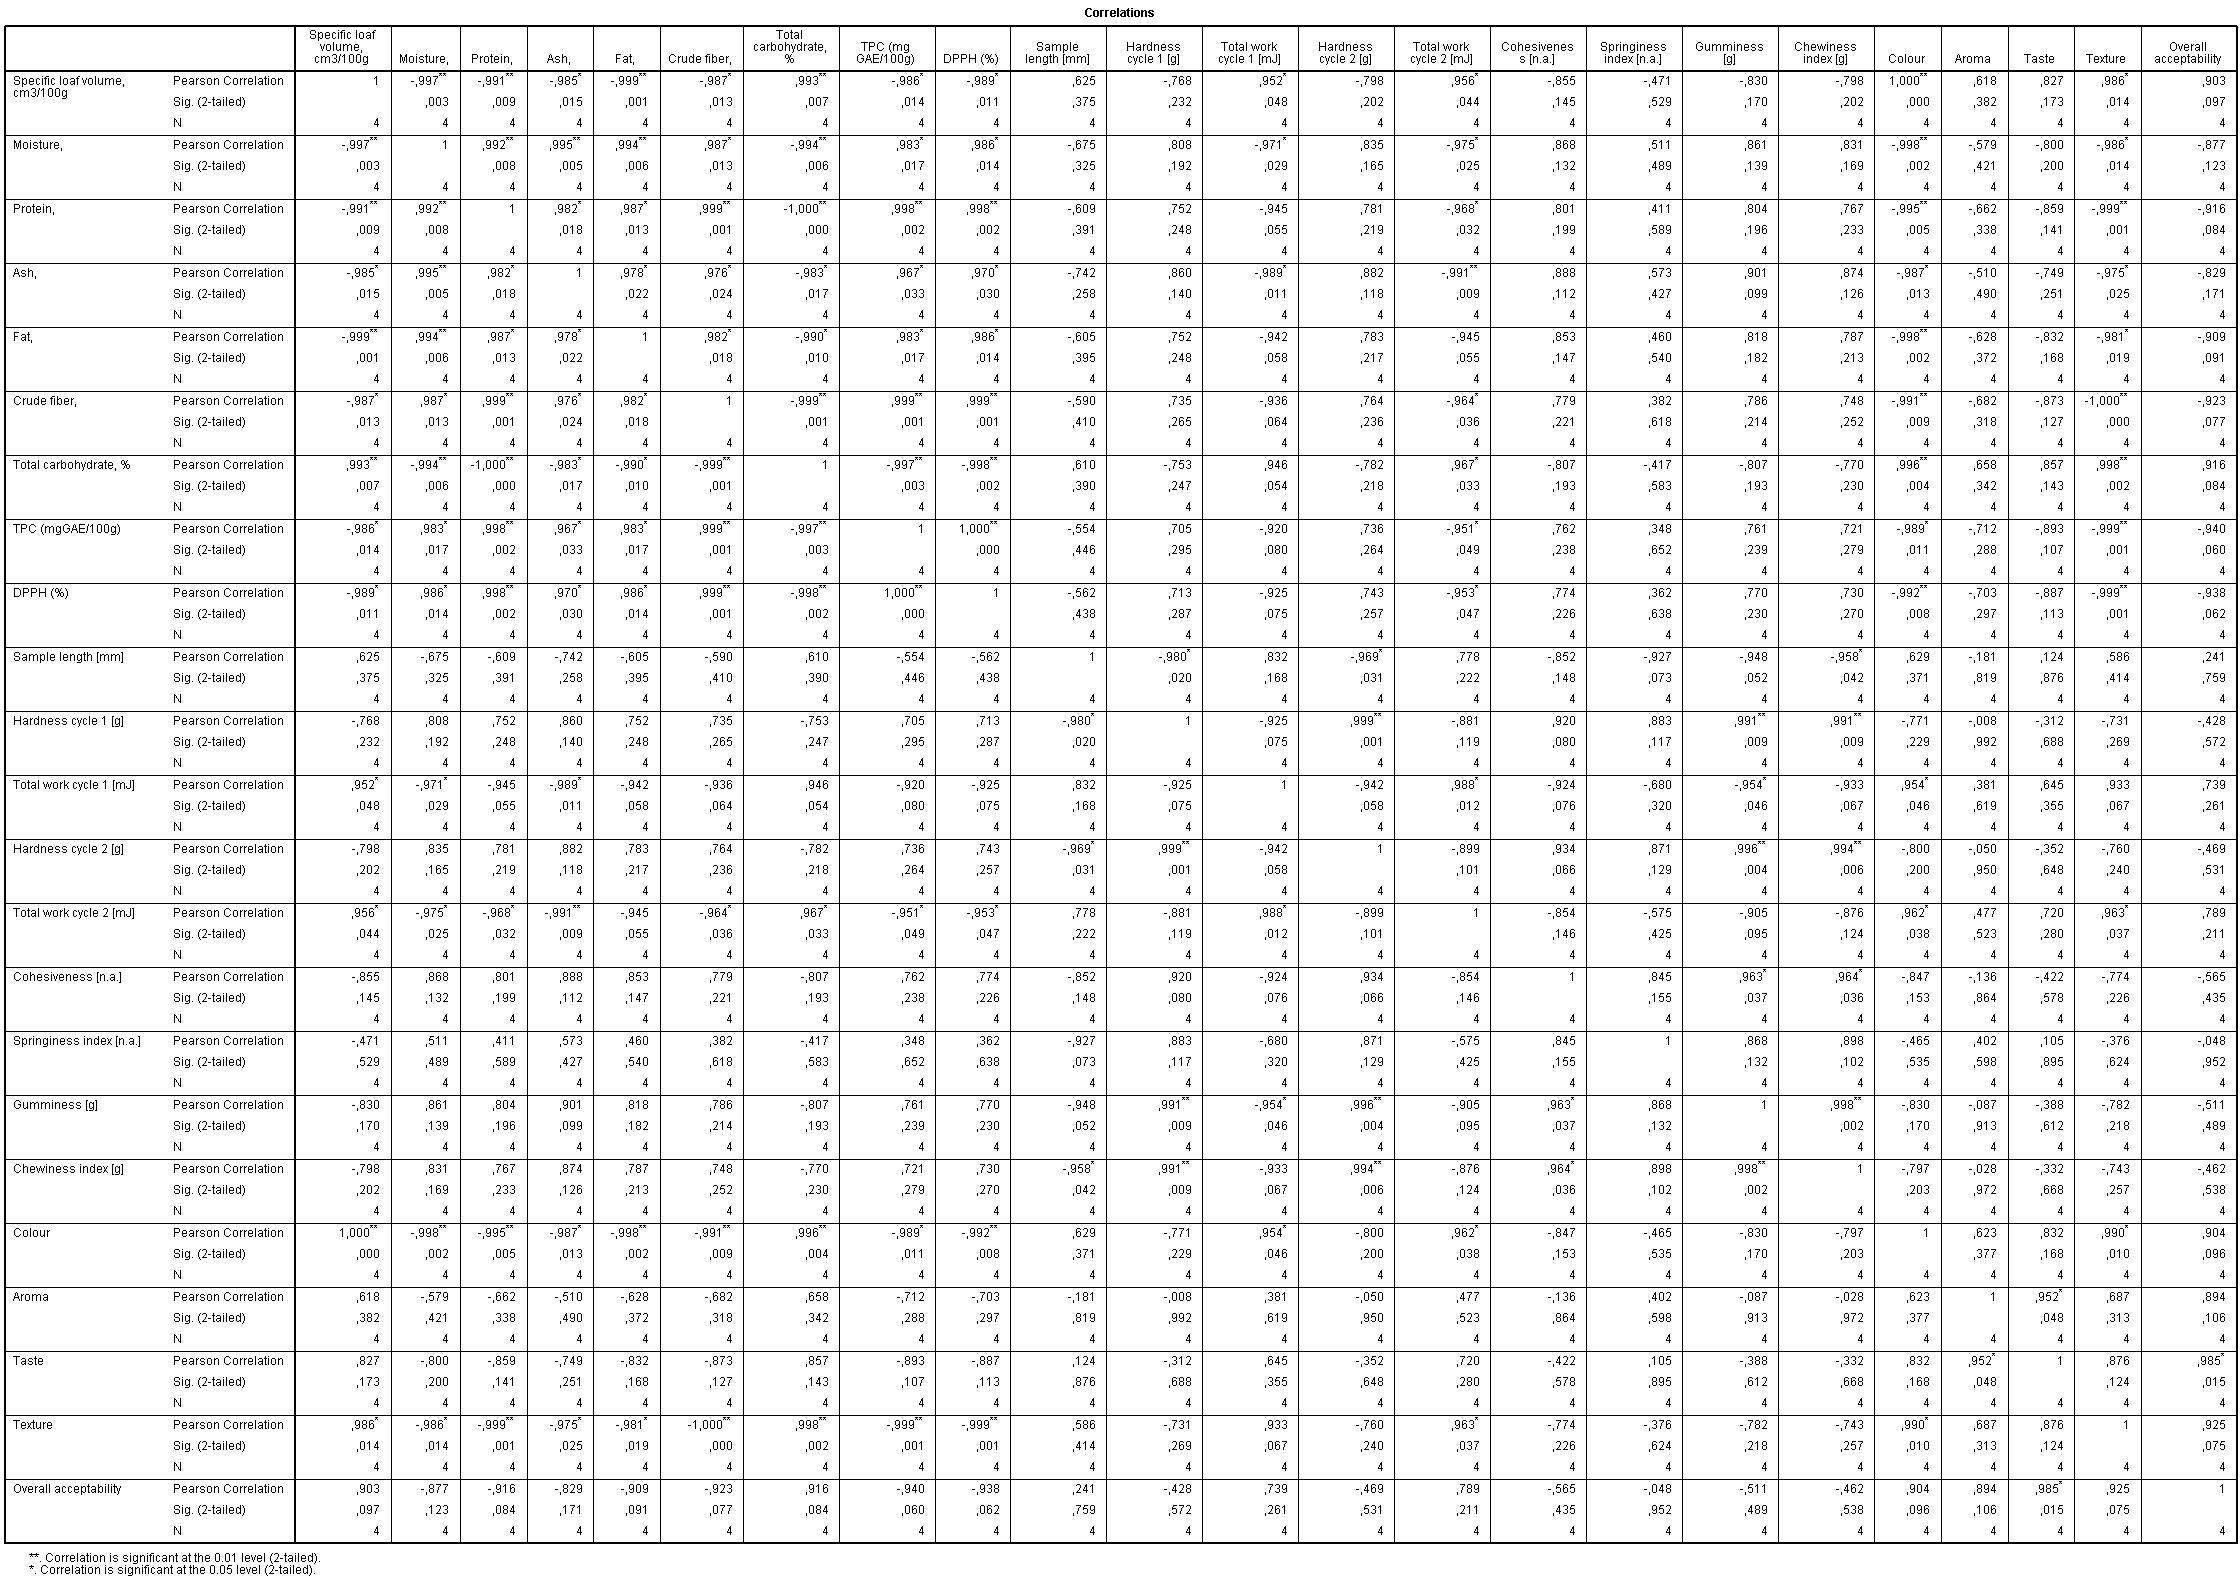


**Figure S2b** Full image

**Figure S2c** Center Zoom

*Note:* 1-B_W0; 2-B_WF2%; 3-B_WF5%; 4-B_WF8%. 1-Specific loaf volume, cm3/100g; -Moisture; 3-Protein; 4-Ash; 5-Fat; 6-Crude fiber; 7-Total carbohydrate; 8-TPC (mgGAE/100g); 9-DPPH (%); 10-Sample length [mm]; 11-Hardness cycle 1 [g]; 12-Total work cycle 1 [mJ]; 13-Hardness cycle 2 [g]; 14-Total work cycle 2 [mJ]; 15-Cohesiveness [n.a.]; 16-Springiness index [n.a.]; 17-Gumminess [g]; 18-Chewiness index [g]; 19-Colour; 20-Aroma; 21-Taste; 22-Texture; 23-Overall acceptability.
